# Supplementary material
Source: publisher site journal article supplement (https://www.dovepress.com/article/562733)
Supplement: Supplementary file 1 [file Supplement%20Table.docx]

Table S1: MAP and HR Comparison Across Time Points in Patient Groups (
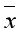
±s points)

| Group | LB | R | C | LB vs R P value | 95%CI | LB vs C P value | 95%CI | R vs C P value | 95%CI |
| --- | --- | --- | --- | --- | --- | --- | --- | --- | --- |
| MAP(mmHg) |  |  |  |  |  |  |  |  |  |
| T1 | 77.07±12.73c | 77.60±6.26 | 77.33±8.72 | 1 | [-6.597,5.530] | 1 | [-6.330,5.797] | 1 | [5.797,6.330] |
| T2 | 71.00±9.89c | 75.27±6.39 | 76.33±8.33 | 0.151 | [-9.518,0.984] | 0.045 | [-10.584,-0.082] | 1 | [-6.318,4.184] |
| T3 | 67.23±7.61bc | 70.83±5.79b | 80.27±8.03b | 0.169 | [-8.146,0.946] | <0.01 | [-17.579,-8.487] | <0.01 | [-13.979,-4.887] |
| HR(times/minute) |  |  |  |  |  |  |  |  |  |
| T1 | 83.63±11.65 | 84.03±9.90 | 80.33±9.14 | 1 | [-6.884,6.084] | 0.652 | [-3.184,9.784] | 0.501 | [-2.784,10.184] |
| T2 | 77.10±11.28a | 79.57±8.05a | 80.50±8.71a | 0.946 | [-8.428,3.494] | 0.502 | [-9.361,2.561] | 1 | [-6.894,5.028] |
| T3 | 77.10±11.28a | 74.00±8.13a | 84.13±8.07a | 1 | [-5.420,4.953] | <0.01 | [-15.553,-5.180] | <0.01 | [-15.320,-4.947] |

Table S2 Comparison of the number of times the analgesic pump was pressed by the patient and muscle strength (grade) at different postoperative time points in the three groups(M(Q1,Q3))

| Group | LB | R | C | Z | P | 95%CI |
| --- | --- | --- | --- | --- | --- | --- |
| Number of PCA pump Presses | 2.0(1.75,3.0) | 3.0(3.0,4.0) | 5.0(4.0,6.0) | 68.995 | <0.01 | [1.510,1.890] |
| Muscle Strength (grade) |  |  |  |  |  |  |
| 12h postoperatively | 4(3,4) | 4(2,4) | 4(4,4) | 12.170 | 0.002 | [3.668,3.866] |
| 24h postoperatively | 4(4,4) | 4(4,4) | 4(4,4) | 0 | 1.0 | [4,4] |
| 72h postoperatively | 4(4,4) | 4(4,4) | 4(4,4) | 0 | 1.0 | [4,4] |
